# Supplementary material for: In situ synthesis of fluorescent copper nanoclusters for rapid detection of ascorbic acid in biological samples
Source: Royal Society of Chemistry journal article supplement (doi:10.1039/c9ay01627a), 2019-01-01
Supplement: c9ay01627a1.pdf [file c9ay01627a1.pdf]

***Supplementary Information***

***In-situ synthesis of fluorescent copper nanoclusters for rapid detection of ascorbic acid in biology samples***

*Xuan Wang, Caicheng Long, Zixin Jiang, Taiping Qing,\* Kaiwu Zhang, Peng Zhang and Bo Feng\**

College of Environment and Resources, Xiangtan University, Xiangtan 411105,  
Hunan Province, China

\* To whom correspondence should be addressed. Tel.: +86 731 58298259; Fax: +86 731 58298172; E-mail: fengbo@xtu.edu.cn. Correspondence may also be addressed to Taiping Qing. E-mail: taiping\_qing@163.com



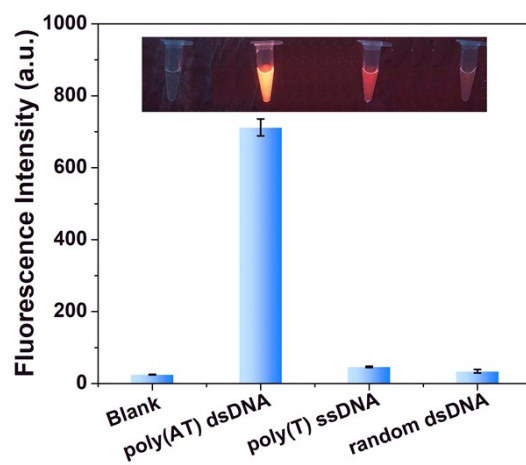

**Fig. S1** Fluorescence intensity of the resulted MOPS buffer solutions in the presence of different oligonucleotides. [oligonucleotide] = 500 nM, [AA] = 3 mM, [Cu<sup>2+</sup>] = 0.3 mM.

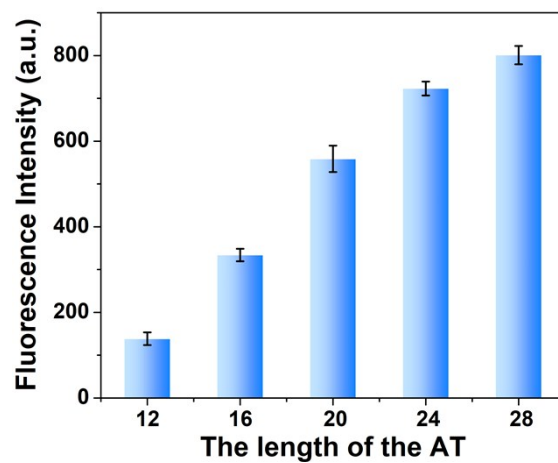

**Fig. S2** Fluorescence intensity of the resulted MOPS buffer solutions in the presence of (AT) of different length.  $[(AT)] = 500 \text{ nM}$ ,  $[AA] = 3 \text{ mM}$ ,  $[Cu^{2+}] = 0.3 \text{ mM}$ .

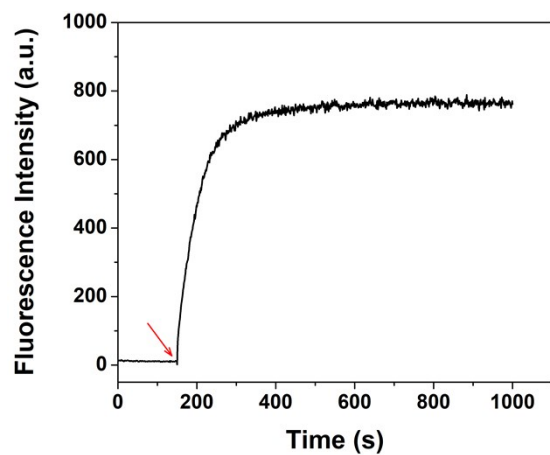

**Fig. S3** Real-time fluorescence scans to demonstrate the fast response for AA sensing. The arrow marks the addition of AA. [(AT)<sub>24</sub> dsDNA] = 500 nM, [AA] = 3 mM, [Cu<sup>2+</sup>] = 0.3 mM.

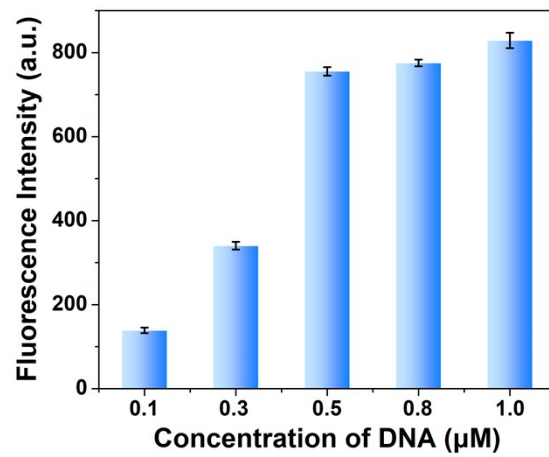

**Fig. S4** Fluorescence intensity of the detection system at different concentration of (AT)<sub>24</sub> dsDNA. [AA] = 3 mM, [Cu<sup>2+</sup>] = 0.3 mM.

**Table S2.** Comparison of the present methods with some of the previously published methods in determination of AA

| Detection probe                                               | Method           | Linear range ( $\mu\text{M}$ ) | Detection limit ( $\mu\text{M}$ ) | Ref.      |
|---------------------------------------------------------------|------------------|--------------------------------|-----------------------------------|-----------|
| Multi-wall carbon nanotubes                                   | Electrochemistry | 100-1000                       | 49.8                              | 1         |
| Boron-doped diamond electrode                                 | Electrochemistry | 10-200                         | 19                                | 2         |
| Mesoporous Carbon/Nafion composite film                       | Electrochemistry | 40-800                         | 20                                | 3         |
| CdSe quantum dots                                             | Electrochemistry | 100-1500                       | 64.5                              | 4         |
| Au-PANI-GCE                                                   | Electrochemistry | 10-12000                       | 8.2                               | 5         |
| Graphene-zinc oxide                                           | Electrochemistry | 50–2350                        | 3.71                              | 6         |
| Enzyme functional metal-organic framework                     | Colorimetry      | 2.57-10.1                      | 1.03                              | 7         |
| Mesoporous silica-coated gold nanorods                        | Colorimetry      | 0-10                           | 0.049                             | 8         |
| Co <sub>3</sub> O <sub>4</sub> /crumpled graphene microsphere | Colorimetry      | 30-140                         | 0.19                              | 9         |
| Reduced graphene oxide nanosheets                             | Colorimetry      | 0.8-60                         | 0.15                              | 10        |
| Carbon dots                                                   | Fluorescence     | 10-200                         | 4.69                              | 11        |
| Graphitic carbon nitride nanosheets                           | Fluorescence     | 0.5-200                        | 0.13                              | 12        |
| Graphene quantum dots                                         | Fluorescence     | 1.11-300                       | 0.32                              | 13        |
| Two-photon nanoparticles                                      | Fluorescence     | 1-20                           | 0.17                              | 14        |
| LaF <sub>3</sub> :Ce,Tb nanoparticles                         | Fluorescence     | 8-100                          | 2.4                               | 15        |
| Copper nanoclusters                                           | Fluorescence     | 50-1000                        | 41.9                              | This work |

## References

1. S.H. Huang, H.H. Liao, D.H. Chen, *Biosens. Bioelectron.*, 2010, **25**, 2351-2355.
2. B.C. Lourenção, R.A. Medeiros, R.C. Rocha-Filho, O. Fatibello-Filho, *Electroanal.*, 2010, **22**, 1717-1723.
3. D. Zheng, J. Ye, L. Zhou, Y. Zhang, C. Yu, *J. Electroanal. Chem.*, 2009, **625**, 82-87.
4. X. Ma, X. Zhang, X. Guo, Q. Kang, D. Shen, G. Zou, *Talanta.*, 2016, **154**, 175-182.
5. H. Zhang, F. Huang, S. Xu, Y. Xia, W. Huang, Z. Li, *Electrochem. Commun.*, 2013, **30**, 46-50.
6. X. Zhang, Y. C. Zhang, L. X. Ma, *Sensor. Actuat. B-Chem*, 2016, **227**, 488-496.
7. C. Gao, H. Zhu, J. Chen, H. Qiu, *Chinese Chemical Letters*, 2017, **28**, 1006-1012.
8. G. Wang, Z. Chen, L. Chen, *Nanoscale*, 2011, **3**, 1756-1759.
9. S. Fan, M. Zhao, L. Ding, H. Li, S. Chen, *Biosenc. Bioelectron.*, 2017, **89**, 846-852.
10. J. Chen, J. Ge, L. Zhang, Z. Li, J. Li, Y. Sun, L. Qu, *Microchim. Acta*, 2016, **183**, 1847-1853.
11. X. Luo, W. Zhang, Y. Han, X. Chen, L. Zhu, W. Tang, J. Wang, T. Yue, Z. Li, *Food Chem.*, 2018, **258**, 214-221.
12. M. Rong, L. Lin, X. Song, Y. Wang, Y. Zhong, J. Yan, Y. Feng, X. Zeng, X. Chen, *Biosenc. Bioelectron.*, 2015, **68**, 210-217.
13. J.J. Liu, Z.T. Chen, D.S. Tang, Y.B. Wang, L.T. Kang, J.N. Yao, *Sens. Actuators B Chem.*, 2015, **212**, 214-219.
14. H.M. Meng, X.B. Zhang, C. Yang, H. Kuai, G.J. Mao, L. Gong, W. Zhang, S. Feng, J. Chang, *Anal. Chem.*, 2016, **88**, 6057-6063.
15. C. Mi, T. Wang, P. Zeng, S. Zhao, N. Wang, S. Xu, *Anal. Methods*, 2013, **5**, 1463-1468
